# Supplementary material for: Genetic and Biological Diversity of Porcine Sapeloviruses Prevailing in Zambia
Source: MDPI journal article supplement (doi:10.3390/v12020180), 2020-02-05
Supplement: s1 [file s1]

Table S1 Primer used in this study

| Primer name  | Sequence (5'-3')                          | Position <sup>1</sup> | Genomic region | Expected size (bp) | Reference     |
|--------------|-------------------------------------------|-----------------------|----------------|--------------------|---------------|
| PSV-Fp       | CGTGCTCCTTTGGTGATTC                       | 156-174               | 5'UTR          | 269                | [20]          |
| PSV-Rp       | GAAAGAGTAGTAGTAGATTCC                     | 404-424               |                |                    |               |
| PSV-VP1-F    | TCCTTTTATGATGGTGATGG                      | 2,829-2,847           | VP1-2A         | 467                | In this study |
| PSV-VP1-R    | CTCCAGAGGAAAACATGTGT                      | 3,276-3,295           |                |                    |               |
| PSV-3TR-F    | GATTTATTGGTTGCCTATCC                      | 6,993-7,012           | 3D-3'UTR       | 439                | In this study |
| PSV-3TR-R    | TGTTAATCCTGTATCACTG                       | 7,413-7,431           |                |                    |               |
| PSV-5RACE-R  | gattacgccaagcttGCCGCGACCCTATCAGGTAGTATAGG | 337-362               | 5'UTR          | -                  | In this study |
| PSV-5RACE-R2 | gattacgccaagcttTCCCAACCTGGAAGCTCACTATGG   | 300-323               |                |                    |               |
| PSV-3RACE-F  | gattacgccaagcttTGGACCAAGAATGCCAGCTACACTC  | 7218-7242             | 3D             | -                  | In this study |

<sup>1</sup> Corresponding to the position of QT2013 genome (Genbank accession no. KJ463384). Small letters indicated the additional universal sequence for RACE PCR. Abbreviations: base pair, bp.

Table S2 Reference sequence used in this study

| Strain | Year              | Country | Accession No. |
|--------|-------------------|---------|---------------|
| V13    | 1958 <sup>1</sup> | UK      | AF406813      |
| C-6    | 2015              | India   | KY053835      |
| csH    | 2009              | China   | HQ875059      |
| YC2011 | 2011              | China   | JX286666      |
| JD2011 | 2011              | China   | KF539414      |
| QT2013 | 2013              | China   | KJ463384      |
| HuN1   | 2015              | China   | KX354740      |
| HuN2   | 2015              | China   | KX354741      |
| HuN3   | 2015              | China   | KX354742      |
| HuN4   | 2015              | China   | KX354743      |
| HuN5   | 2016              | China   | MF440633      |
| HuN6   | 2016              | China   | MF440634      |
| HuN7   | 2016              | China   | MF440635      |
| HuN8   | 2016              | China   | MF440636      |
| HuN9   | 2016              | China   | MF440637      |
| HuN10  | 2016              | China   | MF440638      |
| HuN11  | 2016              | China   | MF440639      |
| HuN12  | 2016              | China   | MF440640      |
| HuN13  | 2016              | China   | MF440641      |
| HuN14  | 2016              | China   | MF440642      |
| HuN15  | 2016              | China   | MF440643      |
| HuN16  | 2016              | China   | MF440644      |
| HuN17  | 2016              | China   | MF440645      |
| HuN18  | 2017              | China   | MF440646      |
| HuN19  | 2017              | China   | MF440647      |
| HuN20  | 2017              | China   | MF440648      |
| HuN21  | 2017              | China   | MF440649      |
| HuN22  | 2017              | China   | MF440650      |
| HuN23  | 2017              | China   | MF440651      |
| HuN24  | 2017              | China   | MF440652      |
| HuN25  | 2014              | China   | MF440653      |
| HuN26  | 2017              | China   | MF440654      |
| HuN27  | 2017              | China   | MF440655      |

|                  |      |             |          |
|------------------|------|-------------|----------|
| HuN28            | 2017 | China       | MF440656 |
| HuN29            | 2017 | China       | MF440657 |
| HuN30            | 2017 | China       | MF440658 |
| HuN31            | 2017 | China       | MF440659 |
| HuN32            | 2017 | China       | MF440660 |
| HuN33            | 2014 | China       | MF440661 |
| PSV-A2           | 2016 | China       | MG732813 |
| PSV-C            | 2016 | China       | MG732814 |
| JXXY-a2          | 2017 | China       | MH626634 |
| JXXY-C           | 2017 | China       | MH626635 |
| KS04105          | 2004 | South Korea | KJ821019 |
| KS05151          | 2005 | South Korea | KJ821020 |
| KS055217         | 2005 | South Korea | KJ821021 |
| IA33375          | 2015 | USA         | KX574284 |
| ISU-SHIC         | 2016 | USA         | KX810827 |
| Jpsv447          | 2009 | Japan       | LC326556 |
| Jpsv1315         | 2009 | Japan       | LC326555 |
| L00798-K11 14-02 | 2014 | Germany     | LT900497 |
| OPY-1            | 2017 | France      | MH513612 |

<sup>1</sup> Reported in 1958

Table S3 Summary of the history and prevalence of PSV infection in pigs in Zambia

|       |          |                  |                     | No. of positive/No. of tested sample (%) |              |                              |              |
|-------|----------|------------------|---------------------|------------------------------------------|--------------|------------------------------|--------------|
|       |          |                  |                     | Suckling stage (0-3 weeks)               |              | Fattening stage (4-12 weeks) |              |
| Farm  | District | Sampling date    | Number<br>of sample | No diarrhea                              | Diarrhea     | No diarrhea                  | Diarrhea     |
| A     | Lusaka   | 7/January/2018   | 24                  | 2/5 (40)                                 | 5/12 (42)    | -                            | 7/7 (100)    |
|       |          | 14/June/2018     | 15                  | -                                        | 4/4 (100)    | 2/2 (100)                    | 9/9 (100)    |
| B     | Chilanga | 25/January/2018  | 4                   | -                                        | -            | -                            | 4/4 (100)    |
|       |          | 10/July/2018     | 15                  | -                                        | -            | 9/9 (100)                    | 6/6 (100)    |
|       |          | 4/December/2018  | 11                  | 0/1 (0)                                  | 1/2 (50)     | 1/1 (100)                    | 6/7 (86)     |
| C     | Kafue    | 13/February/2018 | 15                  | -                                        | 0/5 (0)      | -                            | 8/10 (80)    |
|       |          | 8/June/2018      | 16                  | -                                        | 2/7 (29)     | 7/8 (88)                     | 1/1 (100)    |
|       |          | 16/August/2018   | 27                  | -                                        | 2/10 (20)    | 12/13 (92)                   | 3/4 (75)     |
| D     | Chibombo | 2/March/2018     | 4                   | -                                        | -            | -                            | 4/4 (100)    |
| E     | Lusaka   | 17/July/2018     | 10                  | -                                        | -            | 4/4 (100)                    | 6/6 (100)    |
|       |          | 20/December/2018 | 6                   | 1/1 (100)                                | -            | 4/4 (100)                    | 1/1 (100)    |
| Total |          |                  | 147                 | 3/7 (42.9)                               | 14/40 (35.0) | 39/41 (95.1)                 | 55/59 (93.2) |

Table S4 Deduced amino acid sequence lengths of encoded proteins in Zambian PSVs

| Isolate | Lengths of encoded proteins (aa) |     |     |     |     |     |     |     |     |    |     |     |             |
|---------|----------------------------------|-----|-----|-----|-----|-----|-----|-----|-----|----|-----|-----|-------------|
|         | L                                | VP4 | VP2 | VP3 | VP1 | 2A  | 2B  | 2C  | 3A  | 3B | 3C  | 3D  | Polyprotein |
| PSV-20  | 84                               | 53  | 238 | 234 | 294 | 226 | 105 | 332 | 100 | 22 | 182 | 462 | 2332        |
| PSV-21  | 84                               | 53  | 238 | 234 | 285 | 226 | 105 | 332 | 100 | 22 | 182 | 462 | 2323        |
| PSV-22  | 84                               | 53  | 238 | 234 | 285 | 226 | 105 | 332 | 100 | 22 | 182 | 462 | 2323        |
| PSV-23  | 84                               | 53  | 238 | 234 | 285 | 226 | 105 | 332 | 100 | 22 | 182 | 462 | 2323        |
| PSV-26  | 84                               | 53  | 238 | 234 | 293 | 226 | 105 | 332 | 100 | 22 | 182 | 462 | 2331        |
| PSV-46  | 84                               | 53  | 238 | 234 | 285 | 226 | 105 | 332 | 100 | 22 | 182 | 462 | 2323        |

Abbreviation: amino acid, aa.

Table S5 Identity comparison of complete ORFs between PSVs

| Strain   | Country | Nucleotide and deduced amino acid identities (%) <sup>1</sup> : |             |             |             |             |             |             |             |             |             |             |             |
|----------|---------|-----------------------------------------------------------------|-------------|-------------|-------------|-------------|-------------|-------------|-------------|-------------|-------------|-------------|-------------|
|          |         | PSV-20                                                          |             | PSV-21      |             | PSV-22      |             | PSV-23      |             | PSV-26      |             | PSV-46      |             |
|          |         | nt                                                              | aa          | nt          | aa          | nt          | aa          | nt          | aa          | nt          | aa          | nt          | aa          |
| PSV-20   | Zambia  |                                                                 |             |             |             |             |             |             |             |             |             |             |             |
| PSV-21   | Zambia  | 89.5                                                            | 95.3        |             |             |             |             |             |             |             |             |             |             |
| PSV-22   | Zambia  | 89.5                                                            | 95.3        | 99.5        | 99.7        |             |             |             |             |             |             |             |             |
| PSV-23   | Zambia  | 89.6                                                            | 95.1        | 99.1        | 99.4        | 99.0        | 99.4        |             |             |             |             |             |             |
| PSV-26   | Zambia  | 92.5                                                            | 98.2        | 86.7        | 94.5        | 86.7        | 94.5        | 86.7        | 94.3        |             |             |             |             |
| PSV-46   | Zambia  | 88.5                                                            | 96.6        | 85.6        | 93.8        | 85.6        | 93.8        | 85.7        | 93.7        | 88.2        | 96.7        |             |             |
| HuN1     | China   | 88.1                                                            | 95.9        | 87.3        | 95.8        | 87.3        | 95.8        | 87.3        | 95.6        | 86.9        | 95.7        | 86.6        | 94.9        |
| HuN2     | China   | 89.2                                                            | 97.3        | 86.9        | 94.0        | 86.9        | 94.0        | 87.0        | 93.8        | 88.5        | 97.5        | 87.8        | 95.8        |
| HuN3     | China   | 89.4                                                            | 97.9        | 86.2        | 94.2        | 86.2        | 94.2        | 86.3        | 94.1        | 89.1        | 98.1        | 88.2        | <b>96.5</b> |
| HuN4     | China   | <b>90.6</b>                                                     | <b>98.3</b> | 87.1        | 94.4        | 87.1        | 94.4        | 87.2        | 94.4        | 89.3        | 98.1        | <b>88.3</b> | 96.5        |
| HuN9     | China   | 87.4                                                            | 95.7        | 87.4        | 95.6        | 87.4        | 95.6        | 87.5        | 95.4        | 87.1        | 95.4        | 86.8        | 95.0        |
| HuN12    | China   | 86.3                                                            | 94.6        | <b>88.7</b> | <b>97.7</b> | <b>88.7</b> | <b>97.7</b> | <b>88.8</b> | <b>97.6</b> | 86.0        | 94.2        | 85.7        | 94.2        |
| HuN17    | China   | 87.3                                                            | 95.4        | 86.8        | 95.5        | 86.8        | 95.4        | 86.8        | 95.2        | 86.7        | 95.2        | 86.5        | 94.4        |
| HuN23    | China   | 89.7                                                            | 98.1        | 86.2        | 94.4        | 86.2        | 94.3        | 86.3        | 94.1        | 89.2        | 97.9        | 88.1        | 96.2        |
| HuN27    | China   | 87.8                                                            | 95.4        | 87.0        | 95.6        | 87.1        | 95.5        | 87.1        | 95.4        | 87.2        | 95.1        | 86.7        | 94.5        |
| QT2013   | China   | 87.9                                                            | 95.6        | 87.4        | 96.0        | 87.4        | 95.9        | 87.5        | 95.7        | 87.0        | 94.9        | 86.8        | 94.5        |
| PSV-A2   | China   | 89.9                                                            | 98.1        | 86.5        | 94.3        | 86.4        | 94.3        | 86.7        | 94.2        | <b>89.6</b> | <b>98.5</b> | 87.8        | 96.4        |
| Jpsv447  | Japan   | 87.5                                                            | 97.1        | 84.4        | 93.3        | 84.4        | 93.2        | 84.4        | 93.1        | 87.5        | 97.3        | 86.6        | 95.6        |
| ISU-SHIC | USA     | 84.5                                                            | 93.1        | 86.3        | 96.1        | 86.3        | 96.1        | 86.3        | 95.9        | 84.0        | 93.2        | 83.3        | 92.6        |
| C-6      | India   | 84.3                                                            | 93.6        | 83.9        | 93.5        | 83.9        | 93.4        | 83.8        | 93.3        | 84.4        | 93.9        | 84.4        | 93.9        |
| V13      | UK      | 83.9                                                            | 93.2        | 84.1        | 94.0        | 84.1        | 94.0        | 84.1        | 93.9        | 83.9        | 93.6        | 84.1        | 93.4        |

<sup>1</sup>The highest identities between the Zambian PSVs and previously reported PSVs are shown in bold face.

Abbreviation: nucleotide sequence identity, nt; deduced amino acid identity, aa.

Table S6 Identity comparison of encoded proteins among *Zambian* PSVs

| Protein | Range of deduced amino acid identities (%): |
|---------|---------------------------------------------|
| L       | 94.0-100                                    |
| VP4     | 92.4-100                                    |
| VP2     | 94.5-100                                    |
| VP3     | 88.0-100                                    |
| VP1     | 78.9-99.6                                   |
| 2A      | 88.9-99.1                                   |
| 2B      | 98.0-100                                    |
| 2C      | 97.8-100                                    |
| 3A      | 97.0-100                                    |
| 3B      | 90.9-100                                    |
| 3C      | 97.8-100                                    |
| 3D      | 98.9-100                                    |

Table S7 Predicted recombination in Zambian PSVs, PSV-20, PSV-26, and PSV-46

| Recombinant | Predicted potential parents |         | Break point  |              | P value of recombination analyses using each bioinformatics method |                         |                         |                         |                         |                         |                         |
|-------------|-----------------------------|---------|--------------|--------------|--------------------------------------------------------------------|-------------------------|-------------------------|-------------------------|-------------------------|-------------------------|-------------------------|
|             | Major                       | Minor   | Beginning    | Ending       | RDP                                                                | GeneConv                | BootScan                | MaxChi                  | Chimera                 | SiScan                  | 3Seq                    |
| PSV-20      | JPSV447                     | PSV-21  | 2790         | 270          | $1.458 \times 10^{-36}$                                            | $7.602 \times 10^{-25}$ | $1.672 \times 10^{-39}$ | $8.804 \times 10^{-33}$ | $1.182 \times 10^{-06}$ | $3.516 \times 10^{-42}$ | $2.753 \times 10^{-12}$ |
|             | HuN17                       | Unknown | 2165         | 2532         | $1.319 \times 10^{-3}$                                             | -                       | $5.951 \times 10^{-1}$  | $1.042 \times 10^{-2}$  | $1.263 \times 10^{-2}$  | $7.607 \times 10^{-6}$  | -                       |
| PSV-26      | PSV-22                      | Jpsv447 | 310          | 2749         | $4.292 \times 10^{-22}$                                            | $2.412 \times 10^{-11}$ | $1.549 \times 10^{-18}$ | $1.511 \times 10^{-18}$ | $3.481 \times 10^{-22}$ | $2.532 \times 10^{-23}$ | $2.753 \times 10^{-12}$ |
| PSV-46      | JD2011                      | Unknown | 1974         | Undetermined | $2.361 \times 10^{-3}$                                             | $1.224 \times 10^{-2}$  | $7.745 \times 10^{-4}$  | $1.294 \times 10^{-3}$  | $5.976 \times 10^{-4}$  | $2.778 \times 10^{-7}$  | $8.158 \times 10^{-6}$  |
|             | JXXY-C                      | Unknown | 2708         | 4852         | $7.020 \times 10^{-11}$                                            | $1.087 \times 10^{-9}$  | $7.281 \times 10^{-14}$ | $5.082 \times 10^{-8}$  | $1.279 \times 10^{-10}$ | $6.055 \times 10^{-15}$ | $8.261 \times 10^{-12}$ |
|             | Unknown                     | HuN26   | Undetermined | 6101         | $3.892 \times 10^{-5}$                                             | -                       | $4.452 \times 10^{-5}$  | $1.977 \times 10^{-7}$  | $6.676 \times 10^{-7}$  | $2.328 \times 10^{-7}$  | $6.383 \times 10^{-8}$  |

- Not predicted

Table S8 Amino acid residue unique to the Lineage 1

| Protein | Amino acid position | Amino acid |                 |
|---------|---------------------|------------|-----------------|
|         |                     | Lineage 1  | Lineage 2 and 3 |
| VP4     | 45                  | G          | N               |
| VP4     | 46                  | M          | A               |
| VP4     | 47                  | V          | M               |
| VP4     | 51                  | T          | S               |
| VP2     | 18                  | V          | A               |
| VP2     | 45                  | A          | G               |
| VP2     | 58                  | S          | A               |
| VP2     | 69                  | R          | Q               |
| VP2     | 72                  | D          | N               |
| VP2     | 124                 | I          | V               |
| VP2     | 141                 | Q          | E               |
| VP2     | 159                 | P          | T               |
| VP2     | 209                 | A          | D               |
| VP2     | 227                 | Q          | M               |
| VP3     | 7                   | I          | V               |
| VP3     | 29                  | Q          | E               |
| VP3     | 33                  | N          | G               |
| VP3     | 56                  | S          | R               |
| VP3     | 58                  | S          | N               |
| VP3     | 59                  | T          | V               |
| VP3     | 62                  | T          | A               |
| VP3     | 63                  | N          | S               |
| VP3     | 64                  | R          | G               |
| VP3     | 65                  | I          | V               |
| VP3     | 71                  | I          | V               |
| VP3     | 75                  | D          | N               |
| VP3     | 77                  | S          | T               |
| VP3     | 78                  | S          | A               |
| VP3     | 80                  | M          | I               |
| VP3     | 81                  | V          | A               |
| VP3     | 90                  | S          | E or G          |
| VP3     | 93                  | S          | V or A          |
| VP3     | 178                 | L          | V               |
| VP3     | 179                 | T          | I or N          |
| VP3     | 211                 | A          | V               |
| VP3     | 216                 | S          | A               |
| VP1     | 5                   | E          | D               |
| VP1     | 13                  | S          | K               |
| VP1     | 14                  | V          | T               |
| VP1     | 22                  | R          | K or M          |
| VP1     | 25                  | Q          | K or R          |
| VP1     | 88                  | G          | D               |
| VP1     | 89                  | T or I     | K               |
| VP1     | 96                  | T          | Q               |
| VP1     | 104                 | Q          | N               |
| VP1     | 114                 | G          | S               |
| VP1     | 136                 | M          | L or V          |
| VP1     | 141                 | A          | P               |
| VP1     | 142                 | S          | A               |
| VP1     | 143                 | K          | A               |

|     |     |   |             |
|-----|-----|---|-------------|
| VP1 | 145 | S | K           |
| VP1 | 147 | V | L           |
| VP1 | 153 | F | Y           |
| VP1 | 156 | N | H           |
| VP1 | 159 | A | V           |
| VP1 | 162 | T | D or N      |
| VP1 | 163 | T | R           |
| VP1 | 165 | R | D or N      |
| VP1 | 166 | T | S           |
| VP1 | 167 | Q | R           |
| VP1 | 168 | I | V           |
| VP1 | 183 | N | D           |
| VP1 | 184 | A | C           |
| VP1 | 208 | Y | N or T      |
| VP1 | 211 | N | Q or R      |
| VP1 | 212 | S | N           |
| VP1 | 213 | A | G           |
| VP1 | 228 | S | A           |
| VP1 | 231 | M | L           |
| VP1 | 236 | D | V or I      |
| VP1 | 238 | D | A or N      |
| VP1 | 239 | A | E           |
| VP1 | 240 | T | V           |
| VP1 | 241 | T | S           |
| VP1 | 243 | A | S           |
| VP1 | 246 | A | V           |
| VP1 | 265 | S | A           |
| VP1 | 273 | R | V           |
| VP1 | 274 | L | Q           |
| VP1 | 278 | Q | T           |
| VP1 | 280 | F | Y           |
| 2A  | 13  | D | E           |
| 2C  | 11  | V | T or I or M |
| 3B  | 8   | R | K           |

---
